# Supplementary material for: Novel decomposition of polycarbonate and effect for marine ecosystem
Source: Royal Society of Chemistry journal article supplement (doi:10.1039/d3ra04127a), 2023-01-01
Supplement: d3ra04127a1.pdf [file d3ra04127a1.pdf]

| Acronyms        | and                             | Abbreviations                                              |
|-----------------|---------------------------------|------------------------------------------------------------|
| BP              | biphenyl                        |                                                            |
| BPA             | bisphenol A                     | 2,2-bis(4-hydroxyphenyl) propane                           |
| BSTFA           |                                 | <i>N</i> , <i>o</i> -bis(trimethylsilyl)trifluoroacetamide |
| DCM             | dichloromethane                 |                                                            |
| DDT             | dichlorodiphenyltrichloroethane |                                                            |
| EPX             | epoxy resin                     |                                                            |
| MT              | metric tone                     |                                                            |
| PAE             | phthalic acid ester             |                                                            |
| PC              | polycarbonate                   |                                                            |
| PCB             | polychlorinated biphenyl        |                                                            |
| PET             | polyethylene terephthalate      |                                                            |
| PH              | phenanthrene                    |                                                            |
| POP             | persist organic pollutant       |                                                            |
| PS              | polystyrene                     |                                                            |
| PVC             | polyvinylchloride               |                                                            |
| SD <sub>1</sub> | styrene dimer                   | 1,3-diphenyl-1-butene                                      |
| SD <sub>2</sub> | styrene dimer                   | 2,4-diphenyl-1-butene                                      |
| SIM             | selected ion monitor            |                                                            |
| SM              | styrene monomer                 |                                                            |
| SO <sub>s</sub> | styrene oligomer                |                                                            |
| ST              | styrene trimer                  | 2,4,6-triphenyl-1-hexene                                   |
| TIM             | total ion monitor               |                                                            |
